# Supplementary material
Source: Springer Nature journal article supplement (https://www.springermedizin.de/resource/supplementary/12936_2014_3613_MOESM4_ESM.pdf/9546070)

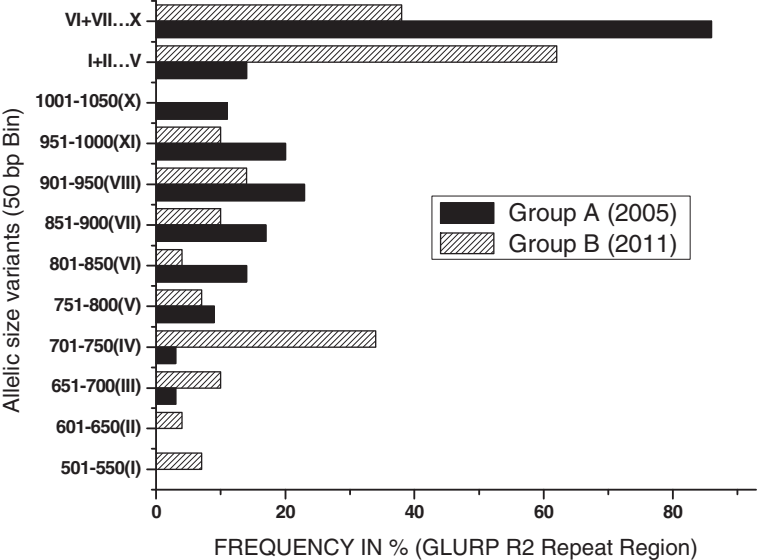

Supplement: MOESM4 [file 9546070]
